# Supplementary material for: Allosteric modulation in monomers and oligomers of a G protein-coupled receptor
Source: eLife journal article supplement (doi:10.7554/elife.11685), 2016-05-06
Supplement: supp [file elife_poa_e11685_Figure_1_figure_supplement_1.docx]

**Figure 1–figure supplement 1**

**

**

**Effect of strychnine on the binding of [3H]NMS and [3H]QNB to membrane-bound M2 receptor**. The binding of [3H]NMS (**A**) or [3H]QNB (**B**) to M2 receptor in membranes from CHO cells was measured at the concentrations of strychnine shown on the *x*-axes. Strychnine and the radioligand were added simultaneously to the receptor, and the reaction mixture was incubated for 3 h (🞅, ●) and 12 h (□, ■) at 30 °C. The concentrations of [3H]NMS and [3H]QNB were 0.131 ± 0.003 nM and 0.022 ± 0.005 nM, respectively, and the corresponding affinities (*K*D) were 0.46 ± 0.03 nM and 0.039 ± 0.008 nM. Data from three (3 h) or two (12 h) experiments were analyzed simultaneously according to Equation 2, taken with two terms for [3H]NMS (*n* = 2) and one term for [3H]QNB (*n* = 1). The lines depict the best fits of the model, and the parametric values are listed in Figure 1-source data 2.

.
