# Supplementary material for: Allosteric modulation in monomers and oligomers of a G protein-coupled receptor
Source: eLife journal article supplement (doi:10.7554/elife.11685), 2016-05-06
Supplement: supp [file elife_poa_e11685_Figure_1_figure_supplement_2.docx]

**Figure 1–figure supplement 2**





**Simulated effect of strychnine on the binding of [3H]NMS according to Scheme S1.** Total specific binding of the orthosteric ligand (RL + ARL) at graded concentrations of strychnine was simulated according to Scheme 1 (equations 13–17) with the parametric values listed in Figure 1-source data 3. The concentration of NMS was taken as equal to the dissociation constant (*i.e.*, 10 nM). The level of binding was computed for different times after the simultaneous addition of both ligands (**A**), after the addition of NMS to a system pre-equilibrated with strychnine (**B**), and after the addition of strychnine to a system pre-equilibrated with NMS (**C**). The times of incubation were as follows: 5 min (*a*), 20 min (*b*), and sufficient time for the attainment of equilibrium (*c*).
