# Supplementary material for: Allosteric modulation in monomers and oligomers of a G protein-coupled receptor
Source: eLife journal article supplement (doi:10.7554/elife.11685), 2016-05-06
Supplement: supp [file elife_poa_e11685_Figure_2_figure_supplement_1.docx]

**Figure 2–figure supplement 1**


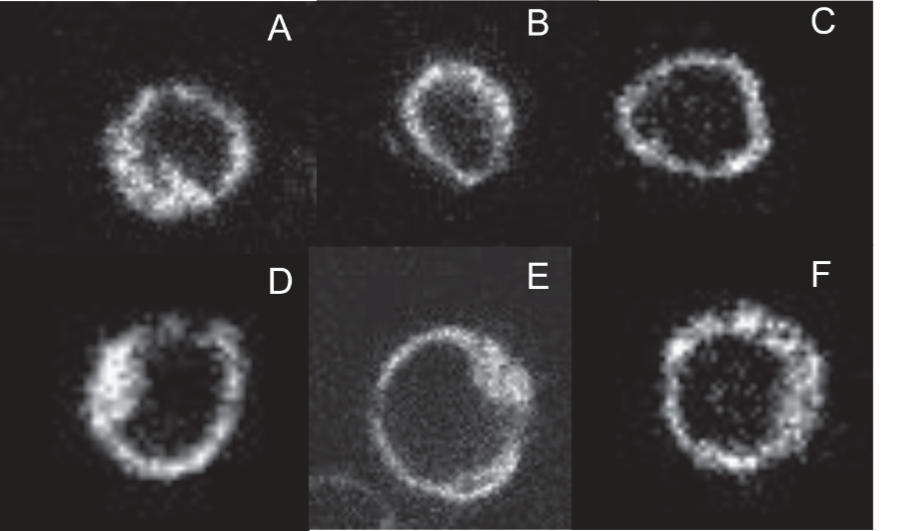


**Expression of fluorophore-tagged M2 receptors.** CHO cells were transfected with plasmids coding for mCh-M2-FCM (*A*), mCh-M2(D103A)-FCM (*B*), M2-FCM (*C*), eGFP-M2 (*D*), mCh-M2 (*E*), and eGFP-M2-mCh (*F*). Images were recorded on a confocal microscope, as described in Materials and Methods, and those shown in the figure were obtained at the middle of the cell in the *Z*-plane. Cells were labelled with FlAsH and excited at 488 nm to obtain the images in *A–C*. eGFP was excited at 488 nm to obtain the image in *D*, and mCh was excited at 561 nm to obtain the images in *E* and *F*.
