# Supplementary material for: Allosteric modulation in monomers and oligomers of a G protein-coupled receptor
Source: eLife journal article supplement (doi:10.7554/elife.11685), 2016-05-06
Supplement: supp [file elife_poa_e11685_Figure_4_figure_supplement_1.docx]

**Figure 4–figure supplement 1**

**
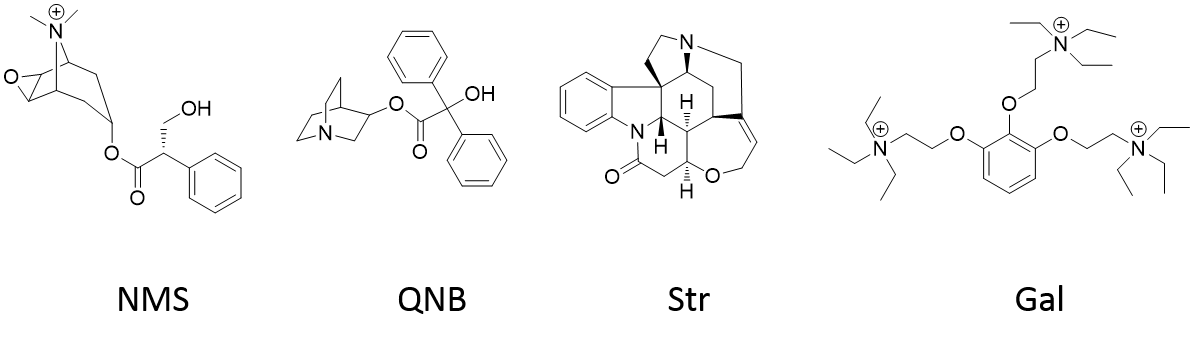
**

**Chemical structures of allosteric and orthosteric ligands to the M2 muscarinic receptor.** The ligands shown are: NMS, *N*-methylscopolamine; QNB, quinuclidinylbenzilate; Str, strychnine; and Gal, gallamine. Different liganded states of the receptor are identified as X_R_Y, where X and Y are the allosteric and orthosteric ligands, respectively. Occupancy is represented as O for a vacant site or as Str, Gal, NMS, or QNB for a ligand-occupied site.
