# Supplementary material for: Allosteric modulation in monomers and oligomers of a G protein-coupled receptor
Source: eLife journal article supplement (doi:10.7554/elife.11685), 2016-05-06
Supplement: supp [file elife_poa_e11685_Figure_5_figure_supplement_1.docx]

**Figure 5–figure supplement 1**


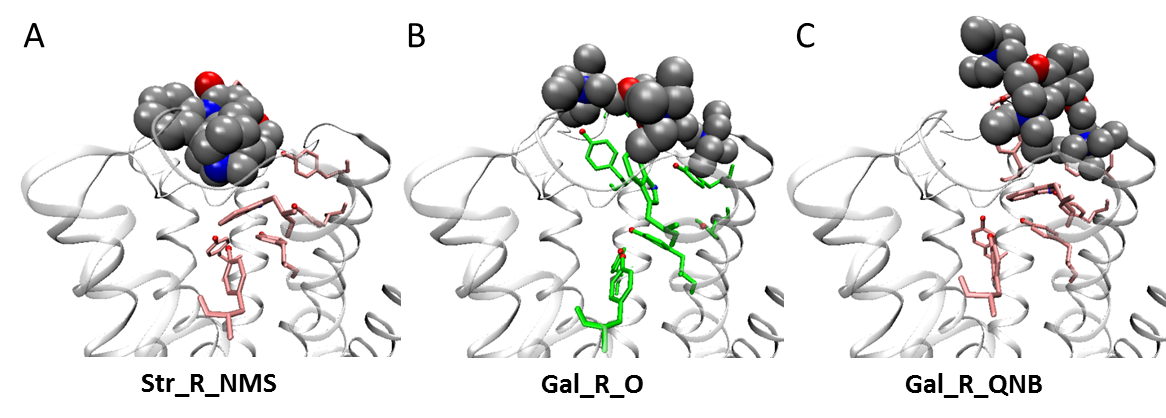


**Orientation of ligands at the allosteric site.** Strychnine adopts a similar pose at the vacant receptor and in the presence of either NMS (**A**) or QNB at the orthosteric site. The position of gallamine at a vacant receptor (**B**) is consistent throughout the simulation. At a QNB-bound receptor (**C**), gallamine is pushed outward, and its orientation is more variable. The orthosteric ligands are not shown in (**A**) and (**C**).
