# Supplementary material for: Allosteric modulation in monomers and oligomers of a G protein-coupled receptor
Source: eLife journal article supplement (doi:10.7554/elife.11685), 2016-05-06
Supplement: supp [file elife_poa_e11685_Figure_5_figure_supplement_2.docx]

**Figure 5–figure supplement 2**


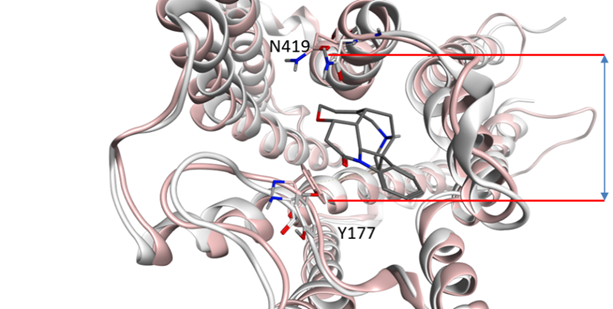


**Width of the vestibule to the orthosteric site of the M2 receptor.** Changes in the distance between the **-carbon atoms of Tyr177 and Asn419 were taken as a measure of the effect of an orthosteric ligand on the conformation of the allosteric site. The structures of the receptor with QNB (3UON, white) and iperoxo (4MQS, pink) at the orthosteric site are superimposed, and the allosteric site is shown as occupied by strychnine. The perspective is toward the extracellular surface of the receptor.
