# Supplementary material for: Allosteric modulation in monomers and oligomers of a G protein-coupled receptor
Source: eLife journal article supplement (doi:10.7554/elife.11685), 2016-05-06
Supplement: supp [file elife_poa_e11685_Figure_5_figure_supplement_3.docx]

**Figure 5 – figure supplement 3**


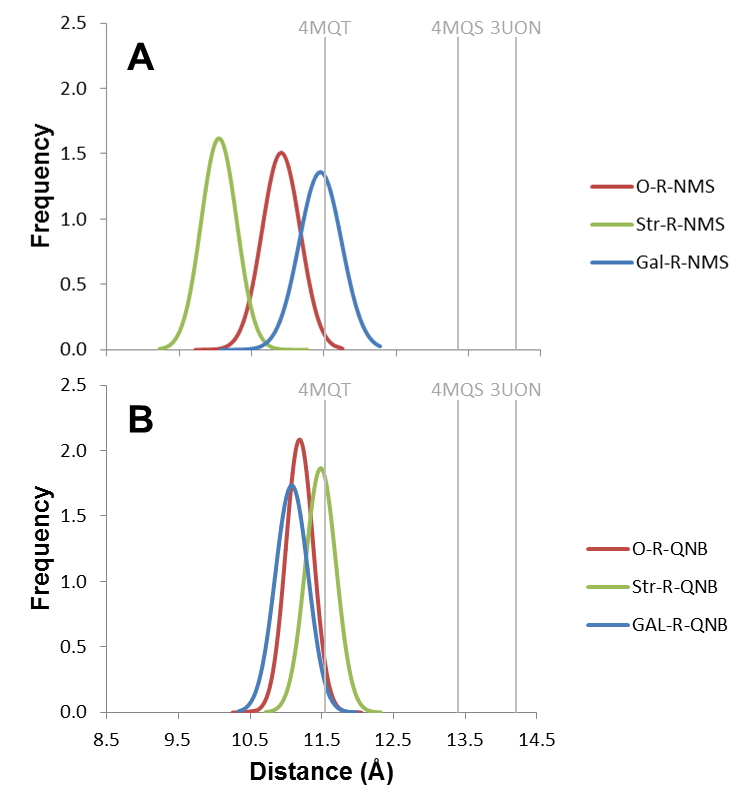


**Distribution of distances between the **-carbon atoms of Tyr177 and Asn419.** The distances from all frames of the molecular dynamics simulations over the production period of 30 ns are shown in the figure for a receptor with NMS (A) or QNB (B) at the orthosteric site. In each case, the allosteric site was vacant (red), occupied by strychnine (green), or occupied by gallamine (blue).
